# Supplementary material for: A Theory Based Intervention to Enhance Information Exchange during Over-The-Counter Consultations in Community Pharmacy: A Feasibility Study
Source: MDPI journal article supplement (doi:10.3390/pharmacy7020073), 2019-06-20
Supplement: s1 [file s1]

# Your pharmacist:

- University-qualified health professional
- Health and medicine expert
- Keeps information confidential

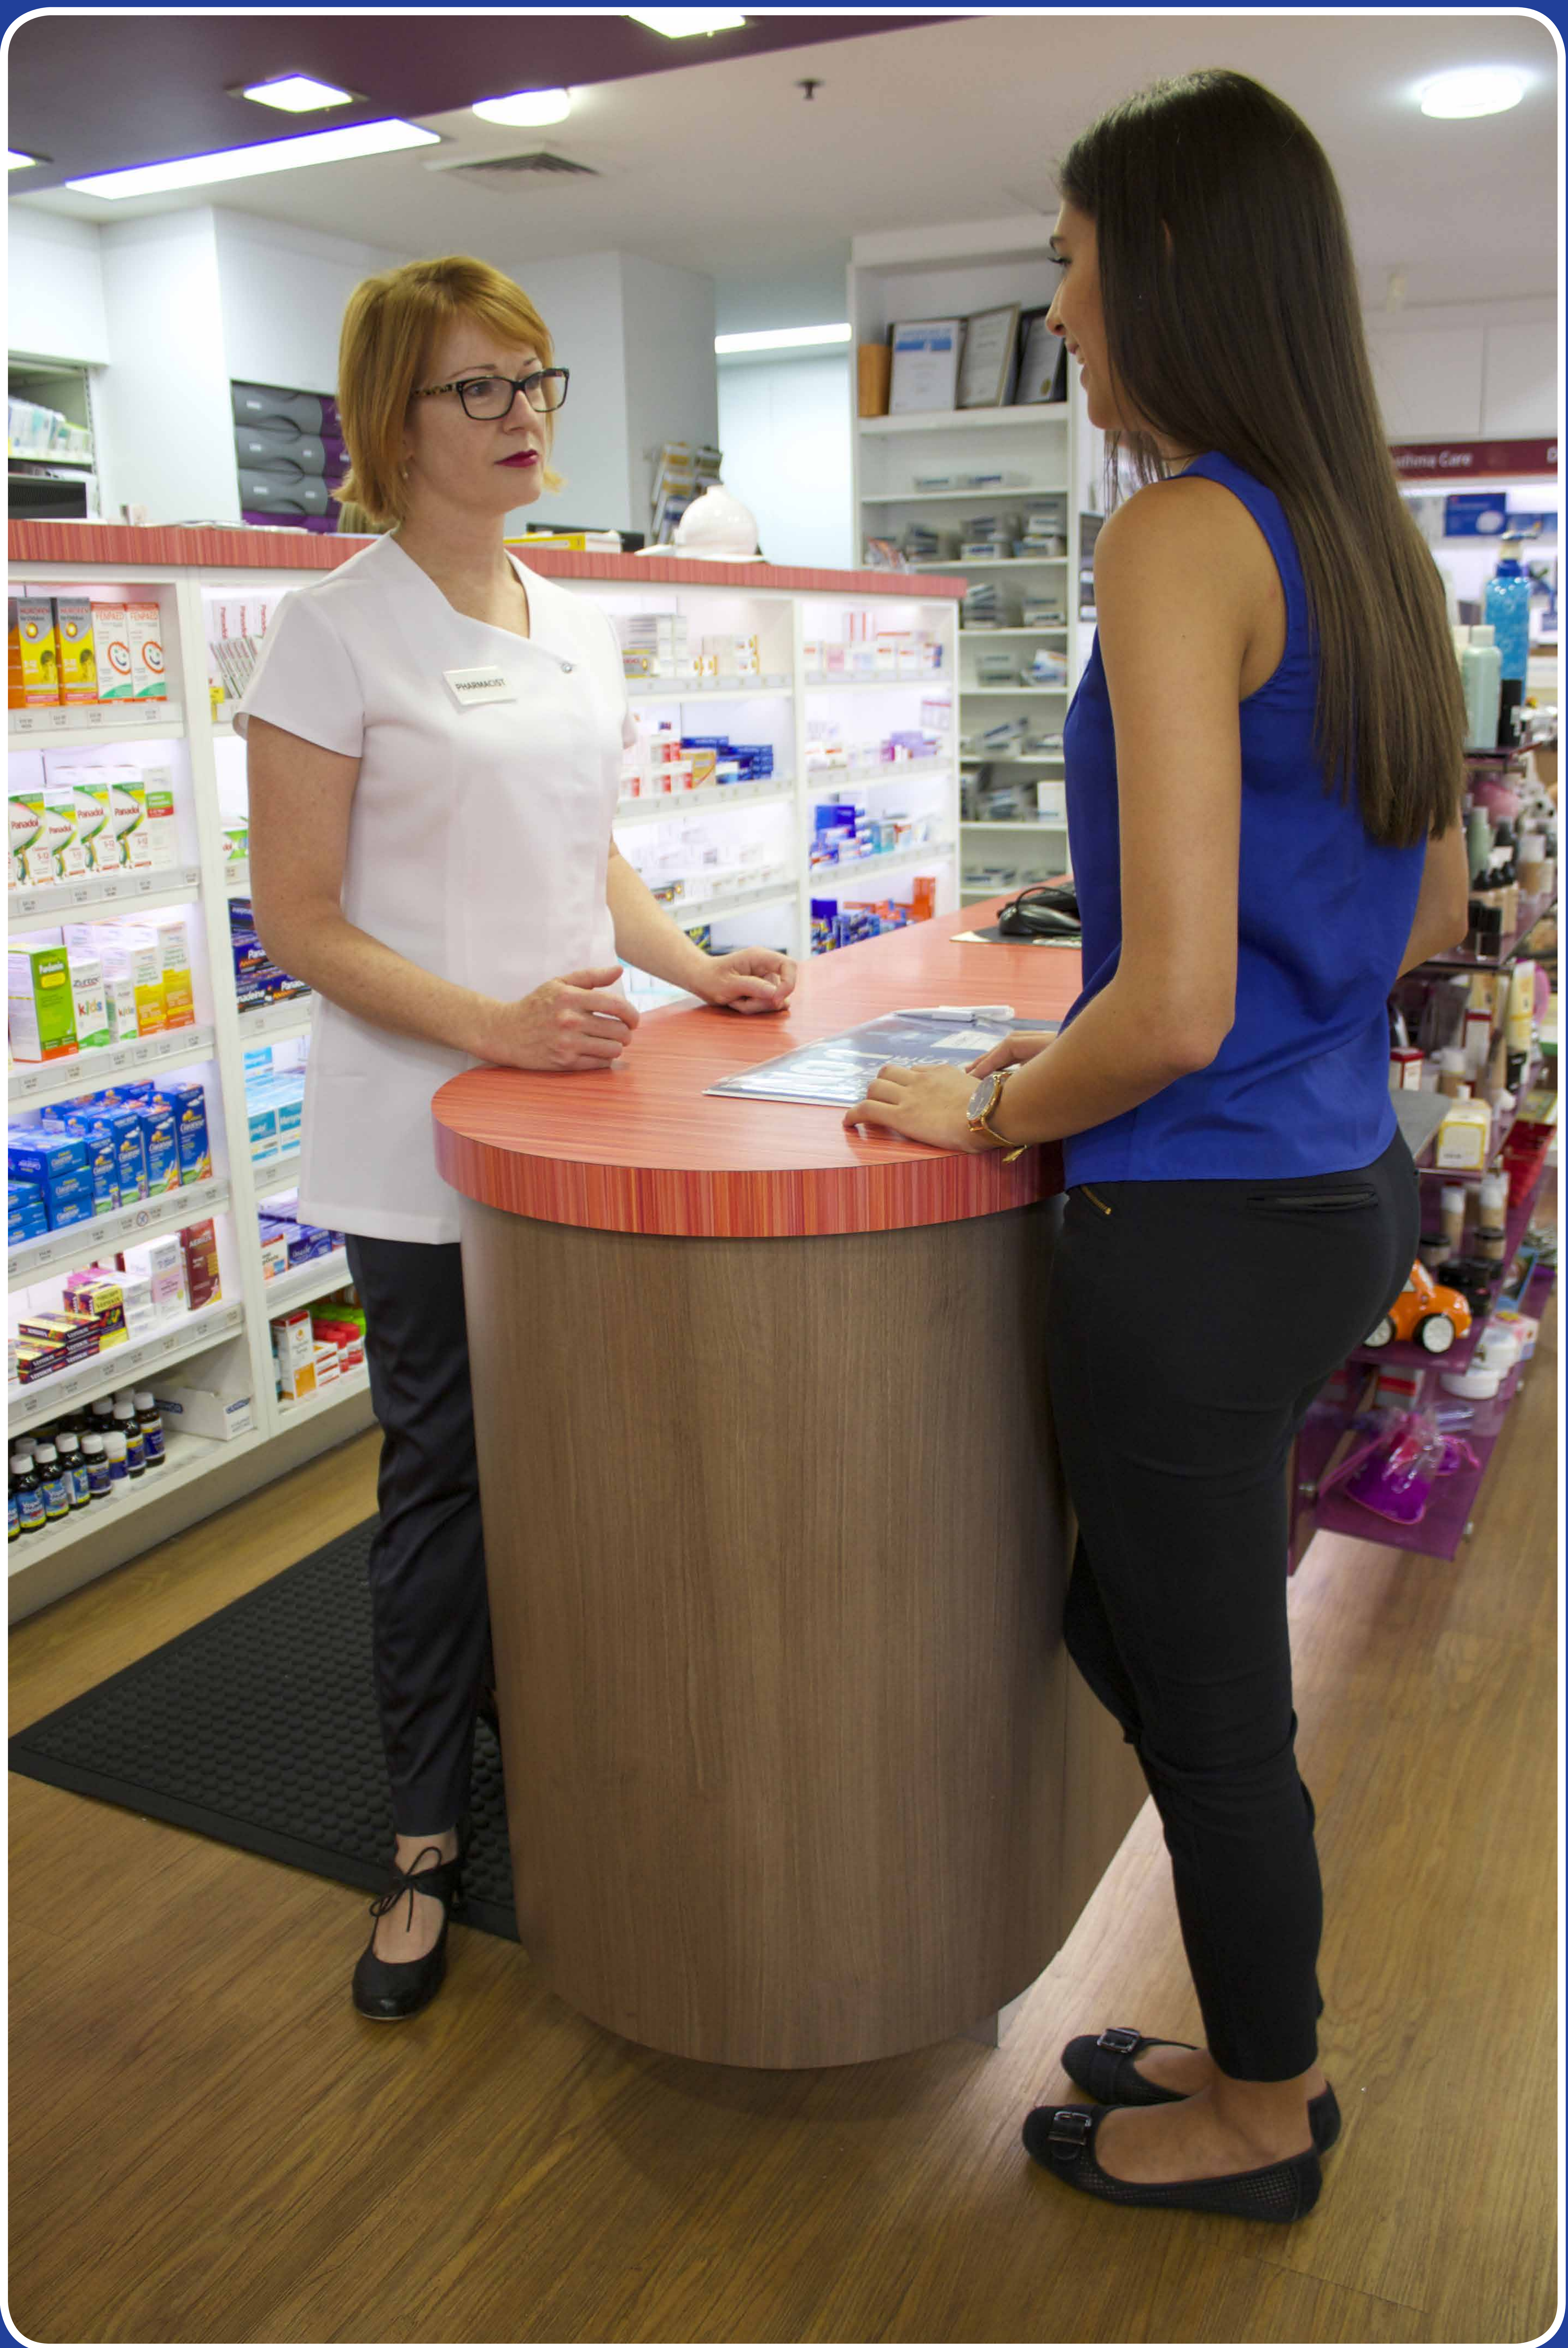

Your pharmacist asks questions to ensure your best health.



# Need a Medicine?

# Talk to your pharmacist.

I need some ibuprofen for my headache. Is it OK to take if I have asthma?

It can affect asthma in some people. I'd like to ask you a few questions to ensure we give you the best treatment.

# Your pharmacist asks questions for your safety.
