# Supplementary material for: A Theory Based Intervention to Enhance Information Exchange during Over-The-Counter Consultations in Community Pharmacy: A Feasibility Study
Source: MDPI journal article supplement (doi:10.3390/pharmacy7020073), 2019-06-20
Supplement: s1 [file s1]

## Semistructured interview feedback on posters

[illegible]

|                                                                                         |                                                                               |                                               |                                                       |                                                    |                                           |                                                                                     |                                                    |                           |                                                                           |                                                                      |                                                                                      |                                          |                                                         |
|-----------------------------------------------------------------------------------------|-------------------------------------------------------------------------------|-----------------------------------------------|-------------------------------------------------------|----------------------------------------------------|-------------------------------------------|-------------------------------------------------------------------------------------|----------------------------------------------------|---------------------------|---------------------------------------------------------------------------|----------------------------------------------------------------------|--------------------------------------------------------------------------------------|------------------------------------------|---------------------------------------------------------|
| 11                                                                                      | 12                                                                            | 13                                            | 14                                                    | 15                                                 | 16                                        | 17                                                                                  | 18                                                 | 19                        | 20                                                                        | 21                                                                   | 22                                                                                   | 23                                       | 24                                                      |
| 1                                                                                       | 1                                                                             | 1                                             | 1                                                     | 1                                                  | 1                                         | 1                                                                                   | 1                                                  | 1                         | 1                                                                         | 1                                                                    | 1                                                                                    | 1                                        | 1                                                       |
| 2                                                                                       | 2                                                                             | 2                                             | 2                                                     | 2                                                  | 2                                         | 2                                                                                   | 2                                                  | 2                         | 1                                                                         | 1                                                                    | 1                                                                                    | 1                                        | 1                                                       |
| pharmacist making best assessment appropriate to the medication to benefit the consumer | customers should provide info to pharmacist                                   | checking to make sure medicine is correct     | need to ask questions to get the best treatment       | share medical history with pharmacist              | talk to your pharmacist                   | sharing of information between staff and customer                                   | pharmacist acting responsibly                      | asking questions          | university qualified and they ask questions                               | what it says                                                         | that pharmacists are knowledgeable, confident and there to help                      | pharmacist provide good customer service | the pharmacist is there to give advice                  |
| the words                                                                               | speech bubble                                                                 | speech bubbles                                | the way the pharmacist is holding patients            | speech bubbles                                     | speech bubbles                            | chemist                                                                             | photo                                              | the people                | university qualified                                                      | person in uniform                                                    | the white uniform                                                                    | the picture                              | interaction in picture                                  |
| wanted to know what info was part of the message                                        | stand out against background                                                  | see what it's all about                       | nice/kind gesture                                     | white background on red                            | stands out                                | in line of sight                                                                    | scene that is expected in pharmacy                 | drawn to people           | very clear to help me reinforce confidence                                |                                                                      | thinking about the 1st question of survey                                            | "good-looking-bird"                      | big                                                     |
| body language --> building rapport                                                      | conversation in text bubble                                                   | display itself                                | medicines behind them                                 | clear ideas, common questions asked in pharmacy    | looks official                            | encouraging people to talk to pharmacist, pharmacists are approachable and friendly | question asked                                     | pharmacists giving advice | is effective getting message across                                       | not effective because eye drawn to picture only                      | the interaction between pharm/customer                                               | no comment, nothing in particular        | 1 on 1 interaction                                      |
| "I'd like to ask you a few questions" actually getting permission first                 | talk to your pharmacist; prominent                                            | nope                                          | ask questions --> need to, to get the right treatment | is it ok?; response of pharmacist                  | talk to your pharmacist; placement at top | is it ok to take; last line - your pharmacist ask questions for your safety         | indicated has a medical condition pharmacist reply | talk to your pharmacist   |                                                                           | only top box of words                                                | qualified                                                                            | not particularly                         | no                                                      |
| not                                                                                     | not very engaging if it was up somewhere, not if I would look at it           | nope                                          | nothing                                               | nothing                                            | no                                        | busy, too many items on poster                                                      | no                                                 | no                        |                                                                           |                                                                      |                                                                                      | dull                                     | the text was too small/ not engaging                    |
| no                                                                                      | no                                                                            | nope                                          | no                                                    | no                                                 | no                                        | no                                                                                  | no                                                 | no                        | don't like photo                                                          | no                                                                   |                                                                                      | no                                       | no, well structured                                     |
| pharmacists are there to help with medical assessment                                   | telling customers to ask questions of pharmacists to get the best health care | promoting pharmacy as a health representative | confidence in this pharmacy; always there to help     | talk to your pharmacist before you get medications | talk to your pharmacist                   | ask questions before taking medication                                              | using medicine safely                              | get info from pharmacists | photo displays professionalism, gives confidence, serious and comfortable | did not feel the poster helped of showed her anything no information | a pharmacist is a knowledgeable, confident alternative to a doctor for health advice | pharmacies provide good services         | the pharmacist is there to give you professional advice |
|                                                                                         |                                                                               |                                               |                                                       |                                                    |                                           |                                                                                     |                                                    |                           |                                                                           |                                                                      | Demarked that it was clearer who the pharmacist was after seeing poster              |                                          |                                                         |

|                                                                                                   |                                                                                                                    |                                                                                          |                                                                                                    |                      |                                                                                  |          |                                                                                                           |                                                                     |                                                                                                                                   |                                                                                                                                                                            |                                                                |                                                               |                                                                  |
|---------------------------------------------------------------------------------------------------|--------------------------------------------------------------------------------------------------------------------|------------------------------------------------------------------------------------------|----------------------------------------------------------------------------------------------------|----------------------|----------------------------------------------------------------------------------|----------|-----------------------------------------------------------------------------------------------------------|---------------------------------------------------------------------|-----------------------------------------------------------------------------------------------------------------------------------|----------------------------------------------------------------------------------------------------------------------------------------------------------------------------|----------------------------------------------------------------|---------------------------------------------------------------|------------------------------------------------------------------|
| 25                                                                                                | 26                                                                                                                 | 27                                                                                       | 28                                                                                                 | 29                   | 30                                                                               | 31       | 32                                                                                                        | 33                                                                  | 34                                                                                                                                | 35                                                                                                                                                                         | 36                                                             | 37                                                            | 38                                                               |
| 1                                                                                                 | 1                                                                                                                  | 1                                                                                        | 1                                                                                                  | 1                    | 1                                                                                | 1        | 1                                                                                                         | 1                                                                   | 1                                                                                                                                 | 1                                                                                                                                                                          | 1                                                              | 1                                                             | 1                                                                |
| 1                                                                                                 | 1                                                                                                                  | 1                                                                                        | 1                                                                                                  | 1                    | 1                                                                                | 1        | 1                                                                                                         | 1                                                                   | 1                                                                                                                                 | 1                                                                                                                                                                          | 1                                                              | 1                                                             | 1                                                                |
| pharmacist and customer exchanging information                                                    | The pharmacist is making sure you're getting the right medicine                                                    | The girls enquiring about something and the pharmacist fills her in with detail and info | consultation                                                                                       | someone seeking info | would take the person behind the counter as an assistant                         | Excluded | pharmacist is giving perso info after asking a question                                                   | They're professionally trained health providers                     | pharmacies want pharmacists to do work that would normally be done by a doctor; pharmacies want more business                     | You should talk to your pharmacist                                                                                                                                         | trust your pharmacist to help you                              | pharmacist is listening to customer                           | pharmacist looks helpful                                         |
| pharmacist white jacket                                                                           | Amanda                                                                                                             | The pharmacist                                                                           | eye to eye contact between the two                                                                 | the girls            | connecting                                                                       |          | pharmacist                                                                                                | Very first line - "University qualified..."                         | picture                                                                                                                           | two people talking --> 1 in pharmacist get up I recognise and customer                                                                                                     | the people                                                     | body language                                                 | people                                                           |
| associates white jackets with professionals                                                       | been at this pharmacy for 40 years                                                                                 | she seems confident in what's for ...                                                    | displays interacion                                                                                | cause I like girls   | got a good attitude                                                              |          | that's what they're talking about                                                                         | Read from top down                                                  | natural to look at a picture before you read it                                                                                   | recognised the dress                                                                                                                                                       | look at people first naturally                                 | posture and stance, look for people naturally                 | most obvious thing                                               |
| in the pharmacy, on site and facing each other                                                    | one-on-one, pharmacist interested enough to enquire, personal contact                                              | the outcoming for the young lady from what the pharmacist is advising                    | pharmacist is th one most visible and open stance consumer talking and discussing                  | communication        | looks as if she's got time                                                       |          | pharmacist looks like she's interested in the customer ...                                                | Overall message                                                     | pharmacists are professional and trustworthy people                                                                               | counter with conversation                                                                                                                                                  | privacy and confidentiality message; pharmacist looks positive | pharmacist is listening and patient is talking                | body language of pharmacist is confident                         |
| qualified, expert, confidentiality --> use of language taught us to recognise them as value words | confidential, knowledgeable and expertise, interest - I'm known here                                               | ask questions --> you want the best product                                              | university qualified, expert -> like to know you're talking to someone of this calibre             | no                   | university qualified, keeps info confidential -> very important                  |          | ask questions quote, because they need to know; trust pharmacist to give right medication to children     | University qualified - trustworthy; Expert; confidential            | something I didn't use before, wouldn't usually volunteer any info, so enlightens me to the fact that medical advice is available | no                                                                                                                                                                         | university qualified; confidential                             | health and medicine expert                                    | last line - your pharmacist asks questions to ensure your health |
| no                                                                                                | nothing                                                                                                            | nothing                                                                                  | nope                                                                                               | nothing              | not very realistic --> usually busy, should have a private place for counselling |          | nothing                                                                                                   | nope                                                                | difficult to answer                                                                                                               | no                                                                                                                                                                         | nothing                                                        | too many words                                                | no                                                               |
| no                                                                                                | nothing                                                                                                            | no                                                                                       | no                                                                                                 | no                   | no                                                                               |          | no                                                                                                        | nope                                                                | opinion that OTC aren't particularly effective anyway, only prescription that matter                                              | "Ask questions" generally pharmacists are good, but often I go to my doctor to get information as pharmacists don't know everything and don't recommend the right products | no                                                             | no                                                            | no                                                               |
| trust your pharmacist                                                                             | I can trust the service provided (I'm on an awful lot of medications), friendliness --> having a nice conversation | you can depend on this pharmacy                                                          | encouraging people to feel free to discuss the status of your health and why you can ask questions | service              | I'm here for you                                                                 |          | That you can trust your pharmacist; You've got to be forthcoming with information - it's a two-way street | If you go to your pharmacist you get professional, qualified advice | advert for pharmacy                                                                                                               | feel confident about pharmacists being health professionals                                                                                                                | communication with your pharmacist                             | reinforcing with customers that pharmacists are there to help | person asking question and pharmacist giving advice              |
| I don't like when pharmacy assistants quiz me because I know more than them (retired nurse)       | Extremely satisfied with my pharmacy                                                                               |                                                                                          |                                                                                                    |                      | Reading the poster definitely changed my perspective                             |          |                                                                                                           | Interesting that there are two women                                |                                                                                                                                   | neat and tidy                                                                                                                                                              |                                                                |                                                               |                                                                  |

|                                                                                      |                                                                                               |                                        |                                                                                             |                                                                       |                                                            |                                                                                 |                                                                                  |                                                                    |                                                                               |                                                                           |                                                                |                                                                   |                                                                                         |
|--------------------------------------------------------------------------------------|-----------------------------------------------------------------------------------------------|----------------------------------------|---------------------------------------------------------------------------------------------|-----------------------------------------------------------------------|------------------------------------------------------------|---------------------------------------------------------------------------------|----------------------------------------------------------------------------------|--------------------------------------------------------------------|-------------------------------------------------------------------------------|---------------------------------------------------------------------------|----------------------------------------------------------------|-------------------------------------------------------------------|-----------------------------------------------------------------------------------------|
| 39                                                                                   | 40                                                                                            | 41                                     | 42                                                                                          | 43                                                                    | 44                                                         | 45                                                                              | 46                                                                               | 47                                                                 | 48                                                                            | 49                                                                        | 50                                                             | 51                                                                | 52                                                                                      |
| 2                                                                                    | 2                                                                                             | 2                                      | 2                                                                                           | 2                                                                     | 2                                                          | 2                                                                               | 2                                                                                | 2                                                                  | 2                                                                             | 2                                                                         | 2                                                              | 2                                                                 | 2                                                                                       |
| 2                                                                                    | 2                                                                                             | 2                                      | 2                                                                                           | 2                                                                     | 2                                                          | 2                                                                               | 2                                                                                | 2                                                                  | 2                                                                             | 2                                                                         | 2                                                              | 2                                                                 | 2                                                                                       |
| you should give information to your pharmacist even if you only need something minor | the pharmacist will check that the medicine is appropriate for you before giving you anything | confidence in the pharmacist           | you can ask a question and get an answer in the right place                                 | check with the pharmacist before buying medicines                     | ask clearly what you want, tell symptoms, ask their advice | to ask your pharmacist about interactions with other medications                | pharmacist is giving full information to the poster                              | about asthma; take advice from the pharmacist                      | The pharmacist can provide info on medication and what you can take with them | the pharmacist is there to provide advice                                 | pharmacist is concerned                                        | pharmacists are here to assist in OTC and find the best treatment | pharmacists are knowledgeable and caring                                                |
| picture                                                                              | speech bubbles, interaction                                                                   | clean and well run                     | the people, then the words                                                                  | the photo                                                             | caring                                                     | red                                                                             | talk to your pharmacist                                                          | the woman in the white coat                                        | the large writing                                                             | the interaction of ibuprofen and asthma (nurse)                           | pharmacist is concerned look                                   | talk to your pharmacist                                           | the picture and the touch of the shoulder                                               |
| largest feature, colours, stands out                                                 | to find out who is saying what                                                                |                                        | they are foremost in the picture                                                            | interaction between pharmacist and customer                           | hand gesture                                               | bright colour                                                                   | the way it's presented - white on red                                            | health professional; reassuring- hand- sympathetic                 | size                                                                          | nursing instinct                                                          | eye contact                                                    | important message                                                 | previously a counsellor knows this can be good but also dangerous                       |
| large text                                                                           | interaction between two people                                                                | the layout of the chemist is efficient | it encourages people that pharmacists have time to chat and it's important to ask questions | the photo --> pharmacist coat                                         | communication                                              | body language, head tilt, hand touch, not intimidating, female - more relatable | arm on customer shows that she is caring                                         | she looks reassuring                                               | the text                                                                      | "Talk to your pharmacist" (large)                                         | confident that pharmacist will help you                        | large writing                                                     | wording                                                                                 |
| talk to your pharmacist                                                              | "is it ok?", "best treatment", "ask questions"                                                | university qualified                   | talk to your pharmacist                                                                     |                                                                       | nothing in particular                                      | best treatment - hope for the best treatment                                    | words of customer - shows that they should tell the pharmacist of other symptoms | she is wanting to ask a few questions to ensure the best treatment | "talk" (large)                                                                | safety                                                                    | best treatment                                                 | "talk"                                                            |                                                                                         |
| speech bubbles - small font specific to the one issue                                | no                                                                                            | no                                     | contact doesn't look natural, looks staged                                                  |                                                                       | not standing at the counter                                | no                                                                              | "need a medicine" - didn't see it                                                | no                                                                 | speech bubbles - too much text                                                | Hand on shoulder! - patronising; speech bubbles are too busy              | not over a counter                                             | nothing                                                           | Body language of pharmacist                                                             |
| no                                                                                   | no                                                                                            | no                                     | not sure about the arm contact                                                              |                                                                       | no                                                         | no                                                                              | no                                                                               | no                                                                 |                                                                               | Hand on shoulder; "it's not like she's dying"                             | conversation bubble is confusing                               | no                                                                | as above                                                                                |
| talk to your pharmacist                                                              | the pharmacist is there to assist and advice                                                  | if you're sick, go to the pharmacist   | education poster                                                                            | Have confidence in seeking advice from your pharmacist about medicine | That you should get advice before taking things            | talk to your pharmacist                                                         | encouraging people to talk to their pharmacist, be very open                     | the woman is reassured and she'll get the right treatment          | you should ask the pharmacist before buying medicine                          | you should talk to your pharmacist about your needs if unsure             | information about expectations of pharmacists                  | the pharmacist knows best, make sure you talk to them             | I can trust my pharmacist and they will ask questions to help me                        |
| no                                                                                   | customers clothing dull                                                                       |                                        | no                                                                                          | Overall a good poster                                                 |                                                            | nice big writing                                                                | good poster                                                                      | simple, straight forward                                           |                                                                               | Survey (question5) "duty of care" should replace "job and responsibility" | surprised that interaction is in a corner not over the counter |                                                                   | "When I was asked to analyze the poster, I wouldn't have picked up any lack of empathy" |

|                                                                                                                                |                                                                                                                               |                                                                                      |                                                                                        |                                                                                                      |                                                                             |          |                                                                                                               |                                                 |                                       |                                                                            |                                                                                                       |                                                                        |                                                                     |
|--------------------------------------------------------------------------------------------------------------------------------|-------------------------------------------------------------------------------------------------------------------------------|--------------------------------------------------------------------------------------|----------------------------------------------------------------------------------------|------------------------------------------------------------------------------------------------------|-----------------------------------------------------------------------------|----------|---------------------------------------------------------------------------------------------------------------|-------------------------------------------------|---------------------------------------|----------------------------------------------------------------------------|-------------------------------------------------------------------------------------------------------|------------------------------------------------------------------------|---------------------------------------------------------------------|
| 53                                                                                                                             | 54                                                                                                                            | 55                                                                                   | 56                                                                                     | 57                                                                                                   | 58                                                                          | 59       | 60                                                                                                            | 61                                              | 62                                    | 63                                                                         | 64                                                                                                    | 65                                                                     | 66                                                                  |
| 2                                                                                                                              | 2                                                                                                                             | 2                                                                                    | 2                                                                                      | 2                                                                                                    | 2                                                                           | 2        | 2                                                                                                             | 2                                               | 2                                     | 2                                                                          | 2                                                                                                     | 2                                                                      | 2                                                                   |
| 2                                                                                                                              | 2                                                                                                                             | 2                                                                                    | 2                                                                                      | 2                                                                                                    | 1                                                                           | 1        | 1                                                                                                             | 1                                               | 1                                     | 1                                                                          | 1                                                                                                     | 1                                                                      | 1                                                                   |
| the pharmacist is knowledgeable and there to help. She has the answer to the ladys question                                    | the person is unsure about the effect, but the pharmacist knows and will question the person to ensure the correct medication | you need information from both sides                                                 | The pharmacist will check to make sure your medications will work and for interactions | The pharmacist is the best person to ask if you have a medical condition and want to buy an OTC item | Be confident to ask Questions from the pharmacist and expect an answer      | Excluded | Pharmacists are qualified, they know what they're talking about and can provide you with the right medication | An expert will help when you go into a pharmacy | Professionalism; trustworthy          | Complicated, too much reading                                              | The pharmacist should know all about drug interactions and keep information confidential; trustworthy | Pharmacists are caring, there to help and easy to talk to. Also young! | Trustworthy and knowledgeable                                       |
| answer from the pharmacist                                                                                                     | the consumer                                                                                                                  | two ladies in photo                                                                  | teh photo                                                                              | speech bubbles                                                                                       | Looks very professional; relaxed and happy customer, focussed pharmacist    |          | Your pharmacist                                                                                               | blue                                            | Blue                                  | Blue                                                                       | One on one                                                                                            | The pharmacist                                                         | Pharmacist's facial expression                                      |
| larger, stands out more                                                                                                        | lacking in colour                                                                                                             |                                                                                      | the hand on shoulder drew attention                                                    | eyes drawn to them                                                                                   | their interaction                                                           |          | Specific to me                                                                                                | don't know                                      | Eye-catching                          | Colour                                                                     | Personal; pharmacist not distracted; no barriers                                                      | Because when I visit the pharmacy, thats who I look for                | Could look friendlier                                               |
| she is getting the information that she needs; reassuring arm                                                                  | touching - empathetic (but too empathetic for the scenario - headache)                                                        | nothing in particular                                                                | that pharmacists are a good source of information                                      | no comment                                                                                           | Photo                                                                       |          | The colours draw you in the big photo                                                                         | interaction                                     | Looking at each other in conversation | Pharmacist looks nice                                                      | In a pharmacy setting                                                                                 | Not too busy                                                           | Customer happy to share information; pharmacist is listening        |
| asthma, headache, "is it ok?" because she's checking it out with the pharmacist                                                | need a medicine                                                                                                               |                                                                                      | All together gives of a sense of caring                                                |                                                                                                      | To ensure your best health                                                  |          | your                                                                                                          | health and medicine expert                      | Expert, confidential, professional    | Health, pharmacist, confidential                                           | Professional expert; YOUR pharmacist                                                                  | Best health                                                            | Confidential; expert in medicine and health; they ask you questions |
| blanket question - not enough information in it                                                                                | too specific; unprofessional shoes, not very unappealing picture but too empathetic for the scenario (headache)               | nothing captures you because it's too busy                                           |                                                                                        |                                                                                                      | Not too interesting                                                         |          |                                                                                                               | logos                                           | No                                    | Pharmacist should be smiling; too much writing; too much in the background | (could have just upper body; not legs)                                                                |                                                                        |                                                                     |
| no                                                                                                                             | selling or advertising ibuprofen                                                                                              |                                                                                      |                                                                                        | "for your safety" --> maybe rephrase "safety of your health"                                         | Too boring                                                                  |          |                                                                                                               | No                                              | No; very easy to understanding        | Health and medicine expert                                                 |                                                                                                       |                                                                        |                                                                     |
| your pharmacist is reliable, there to help you and give you the best treatment; feel free to ask your pharmacist any questions | getting people to ask for advice of the effect of various drugs; "is it safe?"                                                | Ask for help when you are buying things OTC                                          | pharmacists provide helpful information                                                | Ask the pharmacist to ensure safety of your health                                                   | People should trust the pharmacist more, rather than always going to the GP |          | My pharmacist has qualification and can provide me in the right medicine to be healthy                        | They want to gain your confidence               | That you can trust the pharmacist     | If you go to a pharmacist you will get expert.../ professional             | Pharmacist is an expert that can be trusted; so you should tell them about your medical conditions    | Pharmacists are there to help and know their stuff                     | Expert; asking information; kept confidential; best treatment       |
| no                                                                                                                             | medicine should not be capitalised; "Need a medicine?" in block letters; maybe - need help?; full stops are not required      | Good message overall (she even was prompted to go and ask the pharmacist a question) |                                                                                        |                                                                                                      | free, no appointments, no wait time                                         |          |                                                                                                               |                                                 | Interesting being part of the survey  | Too muddled                                                                |                                                                                                       |                                                                        |                                                                     |

|                                                     |                                                            |                                                                                                                        |                                                                                |                                                                                        |                                             |                                                                         |                                                        |                                                                                                                  |                                                                                                                                                            |                                                                                              |
|-----------------------------------------------------|------------------------------------------------------------|------------------------------------------------------------------------------------------------------------------------|--------------------------------------------------------------------------------|----------------------------------------------------------------------------------------|---------------------------------------------|-------------------------------------------------------------------------|--------------------------------------------------------|------------------------------------------------------------------------------------------------------------------|------------------------------------------------------------------------------------------------------------------------------------------------------------|----------------------------------------------------------------------------------------------|
| 67                                                  | 68                                                         | 69                                                                                                                     | 70                                                                             | 71                                                                                     | 72                                          | 73                                                                      | 74                                                     | 75                                                                                                               | 76                                                                                                                                                         | 77                                                                                           |
| 2                                                   | 2                                                          | 2                                                                                                                      | 2                                                                              | 2                                                                                      | 2                                           | 2                                                                       | 2                                                      | 2                                                                                                                | 2                                                                                                                                                          | 2                                                                                            |
| 1                                                   | 1                                                          | 1                                                                                                                      | 1                                                                              | 1                                                                                      | 1                                           | 1                                                                       | 1                                                      | 1                                                                                                                | 1                                                                                                                                                          | 1                                                                                            |
| Communication with the staff                        | Health and medicine expert                                 | Pharmacists will ask questions about your health to help you                                                           | You can trust the pharmacist and can see them instead of doctor                | well-trained; uni degree in health; they won't gossip about your health                | Professional                                | To instill confidence that you'll get the right information             | Caring                                                 | University qualified health professional; confidential                                                           | Pharmacist is having a conversation                                                                                                                        | Pharmacists are qualified professionals                                                      |
| The pharmacist                                      | The pharmacist                                             |                                                                                                                        | The questions                                                                  | Lady in white shirt                                                                    | Photo                                       | The orange counter                                                      | Photo                                                  | Words/ information                                                                                               | Faces                                                                                                                                                      | Photo                                                                                        |
| The interaction between them                        | She looks helpful                                          |                                                                                                                        | Not sure                                                                       | Looks like a nurse or doctor                                                           | They are talking                            | Sets up a barrier                                                       | One is tall and other is short; asking for information | Because they often think that products in pharmacies are useless; commercial                                     | People - real life situation                                                                                                                               | Centred, drawn to people                                                                     |
| You have somebody to talk to without be interrupted | Simplicity - concentration on what it is about             | Picture is welcoming                                                                                                   | Confidential and freindly look of pharmacist                                   | neat, clean, spacious                                                                  | Conversation going on                       | University-qualified health professional                                | nothing; doesn't grab me                               | The information / wording at the top                                                                             | Photo of pharmacist listening to customer                                                                                                                  | Reminds that pharmacists are more than shopkeepers                                           |
| Keeps information confidential                      | Health and medicine expert; keeps information confidential | Qualified                                                                                                              | Confidential                                                                   | Health and medicine expert                                                             | Medicine expert -> must know their products | Keeps information confidential - reassuring                             | University qualified professional                      | University qualified; confidential                                                                               | Bottom line of writing                                                                                                                                     | University qualified, professional, confidential                                             |
|                                                     |                                                            | Wording - consider rephrasing                                                                                          |                                                                                | Not really                                                                             | Nothing                                     | Orange counter; body language of people                                 | Doesn't effect me at all                               |                                                                                                                  | Not very attractive and engaging, no line to draw you                                                                                                      |                                                                                              |
|                                                     |                                                            | "Health and medicine expert" --> may be over the top? Maybe use "professionally qualified to help with general health" |                                                                                |                                                                                        |                                             |                                                                         |                                                        | no one is an "expert"                                                                                            |                                                                                                                                                            |                                                                                              |
| You can interact with your chemist                  | You can get good service                                   | Pharmacists are qualified to help you with general health enquiries                                                    | Pharmacists are trustworthy; can seek advice from pharmacist instead of doctor | If you want help you must aks the pharmacist about interactions with other medications | Encouraging you to talk to your pharmacist  | Confidence in people seeking advice prior to or after going to a doctor | Encouraging positive interaction with pharmacists      | Pharmacists know a lot about health and medicine; all points are true                                            | Promoting pharmacists as part of health care service                                                                                                       | Encouraging people to trust and value the pharmacist                                         |
| This pharmacy is very good! Professional, polite    | Always wonderful and helpful here                          | Intrusive? --> Questions may be intrusive to some customers who know what product they want                            |                                                                                | ? Medicine expert                                                                      |                                             |                                                                         |                                                        | Concerns about pain relief medications... --> not sure how much he can rely on pharmacists (from own experience) | Interesting that picked two women, also young customers --> most customers in pharmacies are older; can't see customers face, should be holding medication | Dominant figure in photo is consumer not pharmacist, could have better photo; words are good |
