# Supplementary material for: A Theory Based Intervention to Enhance Information Exchange during Over-The-Counter Consultations in Community Pharmacy: A Feasibility Study
Source: MDPI journal article supplement (doi:10.3390/pharmacy7020073), 2019-06-20
Supplement: s1 [file s1]

## Supplementary Material 3

Theoretical Domains Framework domains with the adapted items[1]

| When I go to a pharmacy with an “over the counter” (OTC) enquiry.... |                                                                                                                                    |                                    |
|----------------------------------------------------------------------|------------------------------------------------------------------------------------------------------------------------------------|------------------------------------|
| TDF Domain*                                                          | Item                                                                                                                               | Likert response                    |
| B Cap                                                                | providing information about my health is                                                                                           | difficult - easy                   |
| B Con                                                                | and I buy a medicine OTC, I do not need advice as OTC medicines are safe.                                                          | strongly disagree - strongly agree |
| B Cap                                                                | I am confident that if I want a specific medicine I can provide information about my health with the pharmacist.                   | strongly disagree - strongly agree |
| B Cap                                                                | I am confident that I can decide if an OTC medicine is appropriate for my condition without help.                                  | strongly disagree - strongly agree |
| B Con                                                                | and I provide information about my health, the pharmacist will keep it confidential/private.                                       | strongly disagree - strongly agree |
| B Con                                                                | and I provide information about my health, the pharmacist will make sure the medicine is safe and appropriate for me.              | strongly disagree - strongly agree |
| ECR                                                                  | I can tell who is a pharmacist and who is a pharmacy assistant.                                                                    | strongly disagree - strongly agree |
| ID                                                                   | it is a pharmacist's job and responsibility to ask me questions about my health.                                                   | strongly disagree - strongly agree |
| ID                                                                   | it is the duty of the pharmacist, as a health professional, to make sure the medicine they recommend/supply is appropriate for me. | strongly disagree - strongly agree |
| ID                                                                   | I trust the pharmacist, as a health professional, to discuss what is best for my enquiry.                                          | strongly disagree - strongly agree |
| Int                                                                  | I intend to provide health information to the pharmacist when I need help with a symptom (e.g. a headache).                        | strongly disagree - strongly agree |
| Int                                                                  | How strong is your intention to provide health information to the pharmacist when purchasing a medicine OTC?                       | not at all strong - very strong    |
| Int                                                                  | I will definitely provide health information to the pharmacist when purchasing a product/medicine (e.g. ibuprofen, Nurofen®).      | strongly disagree - strongly agree |
| K                                                                    | I know what the pharmacist's role and responsibilities are.                                                                        | strongly disagree - strongly agree |
| K                                                                    | I know that pharmacists are qualified to assist me with my enquiry.                                                                | strongly disagree - strongly agree |
| K                                                                    | I know that giving information to the pharmacist about my health will benefit me.                                                  | strongly disagree - strongly agree |

\*K - Knowledge; ECR - Environmental context & resources; ID - Social & Professional role & identity; B Cap - Belief about capability; B Con - Belief about consequences; Int - Intentions

1. Huijg JM, Gebhardt WA, Crone MR, Dusseldorp E, Presseau J. Discriminant content validity of a theoretical domains framework questionnaire for use in implementation research. *Implementation Science* : IS. 2014;9(1):11-. doi:10.1186/1748-5908-9-11.

## General information:

Gender: ☐ Male ☐ Female

Age (years): \_\_\_\_\_

Marital Status: ☐ Single ☐ Married  
☐ **other:** \_\_\_\_\_

Highest education: ☐ High School ☐ TAFE  
☐ University ☐ **other:** \_\_\_\_\_

Employment: ☐ Employed ☐ Unemployed  
☐ Student ☐ Retired  
☐ **other:** \_\_\_\_\_

Where were you born? \_\_\_\_\_

If you were born outside Australia, what age were you when you came to Australia? \_\_\_\_\_

First language: ☐ English ☐ **other:** \_\_\_\_\_

Language spoken at home: ☐ English ☐ **other:** \_\_\_\_\_

Health Status: ☐ Excellent ☐ Very Good  
☐ Good ☐ Poor

My usual pharmacy is:  
☐ This pharmacy ☐ Another pharmacy  
☐ I don't have one

I visit a pharmacy: ☐ Weekly ☐ Fortnightly  
☐ Monthly ☐ Less than monthly

***Thank you for your participation.***

P:  
SitCue:  
#

## Community Pharmacy Survey

We are conducting a study in community pharmacies and are interested in your thoughts about when you go to a pharmacy with an “over the counter” (OTC) enquiry. That is, when you go to the pharmacy to **ask advice about a symptom** (e.g. headache) or to **buy a medicine** (e.g. paracetamol, *Panadol®*).

We would appreciate your responses to some questions about this. There are no right or wrong answers. Please tell us what you really think.

Some of the questions may *appear to be similar* so please read each question carefully and circle the number that best describes your opinion.

Note: We are **not** asking your thoughts about prescription medicines.

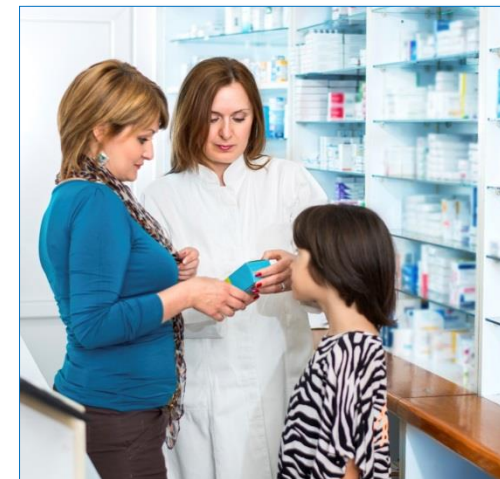

## Community Pharmacy Survey

### When I go to a pharmacy with an “over the counter” (OTC) enquiry...

|                                                                                                                                    |                                                                                                               |
|------------------------------------------------------------------------------------------------------------------------------------|---------------------------------------------------------------------------------------------------------------|
| I can tell who is a pharmacist and who is a pharmacy assistant.                                                                    | strongly disagree: <u>1</u> : <u>2</u> : <u>3</u> : <u>4</u> : <u>5</u> : <u>6</u> : <u>7</u> :strongly agree |
| and I provide information about my health, the pharmacist will make sure the medicine is safe and appropriate for me.              | strongly disagree: <u>1</u> : <u>2</u> : <u>3</u> : <u>4</u> : <u>5</u> : <u>6</u> : <u>7</u> :strongly agree |
| I know what the pharmacist's role and responsibilities are.                                                                        | strongly disagree: <u>1</u> : <u>2</u> : <u>3</u> : <u>4</u> : <u>5</u> : <u>6</u> : <u>7</u> :strongly agree |
| I intend to provide health information to the pharmacist when I need help with a symptom (e.g. a headache).                        | strongly disagree: <u>1</u> : <u>2</u> : <u>3</u> : <u>4</u> : <u>5</u> : <u>6</u> : <u>7</u> :strongly agree |
| it is a pharmacist's job and responsibility to ask me questions about my health.                                                   | strongly disagree: <u>1</u> : <u>2</u> : <u>3</u> : <u>4</u> : <u>5</u> : <u>6</u> : <u>7</u> :strongly agree |
| providing information about my health is                                                                                           | difficult: <u>1</u> : <u>2</u> : <u>3</u> : <u>4</u> : <u>5</u> : <u>6</u> : <u>7</u> :easy                   |
| and I buy a medicine OTC, I do not need advice as OTC medicines are safe.                                                          | strongly disagree: <u>1</u> : <u>2</u> : <u>3</u> : <u>4</u> : <u>5</u> : <u>6</u> : <u>7</u> :strongly agree |
| I know that pharmacists are qualified to assist me with my enquiry.                                                                | strongly disagree: <u>1</u> : <u>2</u> : <u>3</u> : <u>4</u> : <u>5</u> : <u>6</u> : <u>7</u> :strongly agree |
| and I provide information about my health, the pharmacist will keep it confidential/private.                                       | strongly disagree: <u>1</u> : <u>2</u> : <u>3</u> : <u>4</u> : <u>5</u> : <u>6</u> : <u>7</u> :strongly agree |
| it is the duty of the pharmacist, as a health professional, to make sure the medicine they recommend/supply is appropriate for me. | strongly disagree: <u>1</u> : <u>2</u> : <u>3</u> : <u>4</u> : <u>5</u> : <u>6</u> : <u>7</u> :strongly agree |
| How strong is your intention to provide health information to the pharmacist when purchasing a medicine OTC?                       | not at all strong: <u>1</u> : <u>2</u> : <u>3</u> : <u>4</u> : <u>5</u> : <u>6</u> : <u>7</u> :very strong    |
| I trust the pharmacist, as a health professional, to discuss what is best for my enquiry.                                          | strongly disagree: <u>1</u> : <u>2</u> : <u>3</u> : <u>4</u> : <u>5</u> : <u>6</u> : <u>7</u> :strongly agree |
| I am confident that if I want a specific medicine I can provide information about my health with the pharmacist.                   | strongly disagree: <u>1</u> : <u>2</u> : <u>3</u> : <u>4</u> : <u>5</u> : <u>6</u> : <u>7</u> :strongly agree |
| I am confident that I can decide if an OTC medicine is appropriate for my condition without help.                                  | strongly disagree: <u>1</u> : <u>2</u> : <u>3</u> : <u>4</u> : <u>5</u> : <u>6</u> : <u>7</u> :strongly agree |
| I will definitely provide health information to the pharmacist when purchasing a product/medicine (e.g. ibuprofen, Nurofen®).      | strongly disagree: <u>1</u> : <u>2</u> : <u>3</u> : <u>4</u> : <u>5</u> : <u>6</u> : <u>7</u> :strongly agree |
| I know that giving information to the pharmacist about my health will benefit me.                                                  | strongly disagree: <u>1</u> : <u>2</u> : <u>3</u> : <u>4</u> : <u>5</u> : <u>6</u> : <u>7</u> :strongly agree |

***Thank you for your participation.***

P:  
SitCue:  
#

## Community Pharmacy Survey

We are conducting a study in community pharmacies and are interested in your thoughts about when you go to a pharmacy with an “over the counter” (OTC) enquiry. That is, when you go to the pharmacy to **ask advice about a symptom** (e.g. headache) or to **buy a medicine** (e.g. paracetamol, *Panadol®*).

We would appreciate your responses to some questions about this. There are no right or wrong answers. Please tell us what you really think.

Some of the questions may *appear to be similar* so please read each question carefully and circle the number that best describes your opinion.

Note: We are **not** asking your thoughts about prescription medicines.

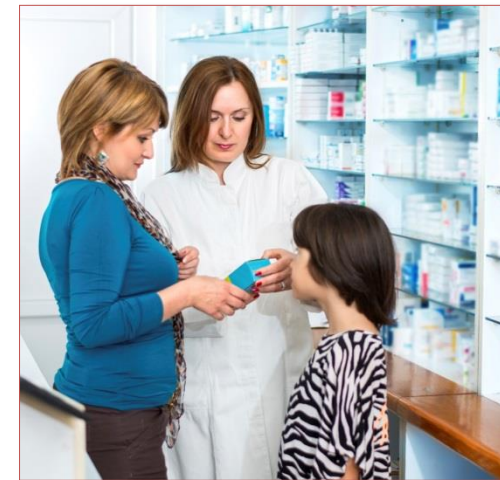

## Community Pharmacy Survey

### When I go to a pharmacy with an “over the counter” (OTC) enquiry...

|                                                                                                                                    |                                                                                                               |
|------------------------------------------------------------------------------------------------------------------------------------|---------------------------------------------------------------------------------------------------------------|
| I can tell who is a pharmacist and who is a pharmacy assistant.                                                                    | strongly disagree: <u>1</u> : <u>2</u> : <u>3</u> : <u>4</u> : <u>5</u> : <u>6</u> : <u>7</u> :strongly agree |
| and I provide information about my health, the pharmacist will make sure the medicine is safe and appropriate for me.              | strongly disagree: <u>1</u> : <u>2</u> : <u>3</u> : <u>4</u> : <u>5</u> : <u>6</u> : <u>7</u> :strongly agree |
| I know what the pharmacist's role and responsibilities are.                                                                        | strongly disagree: <u>1</u> : <u>2</u> : <u>3</u> : <u>4</u> : <u>5</u> : <u>6</u> : <u>7</u> :strongly agree |
| I intend to provide health information to the pharmacist when I need help with a symptom (e.g. a headache).                        | strongly disagree: <u>1</u> : <u>2</u> : <u>3</u> : <u>4</u> : <u>5</u> : <u>6</u> : <u>7</u> :strongly agree |
| it is a pharmacist's job and responsibility to ask me questions about my health.                                                   | strongly disagree: <u>1</u> : <u>2</u> : <u>3</u> : <u>4</u> : <u>5</u> : <u>6</u> : <u>7</u> :strongly agree |
| providing information about my health is                                                                                           | difficult: <u>1</u> : <u>2</u> : <u>3</u> : <u>4</u> : <u>5</u> : <u>6</u> : <u>7</u> :easy                   |
| and I buy a medicine OTC, I do not need advice as OTC medicines are safe.                                                          | strongly disagree: <u>1</u> : <u>2</u> : <u>3</u> : <u>4</u> : <u>5</u> : <u>6</u> : <u>7</u> :strongly agree |
| I know that pharmacists are qualified to assist me with my enquiry.                                                                | strongly disagree: <u>1</u> : <u>2</u> : <u>3</u> : <u>4</u> : <u>5</u> : <u>6</u> : <u>7</u> :strongly agree |
| and I provide information about my health, the pharmacist will keep it confidential/private.                                       | strongly disagree: <u>1</u> : <u>2</u> : <u>3</u> : <u>4</u> : <u>5</u> : <u>6</u> : <u>7</u> :strongly agree |
| it is the duty of the pharmacist, as a health professional, to make sure the medicine they recommend/supply is appropriate for me. | strongly disagree: <u>1</u> : <u>2</u> : <u>3</u> : <u>4</u> : <u>5</u> : <u>6</u> : <u>7</u> :strongly agree |
| How strong is your intention to provide health information to the pharmacist when purchasing a medicine OTC?                       | not at all strong: <u>1</u> : <u>2</u> : <u>3</u> : <u>4</u> : <u>5</u> : <u>6</u> : <u>7</u> :very strong    |
| I trust the pharmacist, as a health professional, to discuss what is best for my enquiry.                                          | strongly disagree: <u>1</u> : <u>2</u> : <u>3</u> : <u>4</u> : <u>5</u> : <u>6</u> : <u>7</u> :strongly agree |
| I am confident that if I want a specific medicine I can provide information about my health with the pharmacist.                   | strongly disagree: <u>1</u> : <u>2</u> : <u>3</u> : <u>4</u> : <u>5</u> : <u>6</u> : <u>7</u> :strongly agree |
| I am confident that I can decide if an OTC medicine is appropriate for my condition without help.                                  | strongly disagree: <u>1</u> : <u>2</u> : <u>3</u> : <u>4</u> : <u>5</u> : <u>6</u> : <u>7</u> :strongly agree |
| I will definitely provide health information to the pharmacist when purchasing a product/medicine (e.g. ibuprofen, Nurofen®).      | strongly disagree: <u>1</u> : <u>2</u> : <u>3</u> : <u>4</u> : <u>5</u> : <u>6</u> : <u>7</u> :strongly agree |
| I know that giving information to the pharmacist about my health will benefit me.                                                  | strongly disagree: <u>1</u> : <u>2</u> : <u>3</u> : <u>4</u> : <u>5</u> : <u>6</u> : <u>7</u> :strongly agree |
