# Supplementary material for: A Theory Based Intervention to Enhance Information Exchange during Over-The-Counter Consultations in Community Pharmacy: A Feasibility Study
Source: MDPI journal article supplement (doi:10.3390/pharmacy7020073), 2019-06-20
Supplement: s1 [file s1]

## Supplementary Material 2

# PHARMACIST

**PHARMACY  
ASSISTANT**
