# Supplementary material for: A Theory Based Intervention to Enhance Information Exchange during Over-The-Counter Consultations in Community Pharmacy: A Feasibility Study
Source: MDPI journal article supplement (doi:10.3390/pharmacy7020073), 2019-06-20
Supplement: s1 [file s1]

## Supplementary Material 4

Semi-structured interview guide for consumers after reviewing a poster.

|                                                                                                                                                                                |
|--------------------------------------------------------------------------------------------------------------------------------------------------------------------------------|
| 1. What is the message you get from the poster?                                                                                                                                |
| 2. When you looked at the poster, what drew your attention first? <ul style="list-style-type: none"><li>• Why do you think that?</li></ul>                                     |
| 3. What do you find to be effective in this poster? <ul style="list-style-type: none"><li>• Are there particular words that are effective? Why?</li></ul>                      |
| 4. What do you find is NOT effective in this poster? <ul style="list-style-type: none"><li>• Is there something you don't agree with or you find confusing? Explain.</li></ul> |
| 5. Now that we've talked about the poster a little, please sum up what you think the poster means.                                                                             |
| 6. Do you have any other comments you'd like to make?                                                                                                                          |

Semi-structured interview guide for pharmacy personnel after the intervention.

|                                                                                                                                                                                                                                                                                                                                                                                                                                                                      |
|----------------------------------------------------------------------------------------------------------------------------------------------------------------------------------------------------------------------------------------------------------------------------------------------------------------------------------------------------------------------------------------------------------------------------------------------------------------------|
| 1. What are your past experiences with OTC queries?                                                                                                                                                                                                                                                                                                                                                                                                                  |
| 2. Thinking about OTC queries, what changes have you seen in the past few weeks?                                                                                                                                                                                                                                                                                                                                                                                     |
| 3. Experiences with the research process: <ul style="list-style-type: none"><li>• How do you feel about having research and researchers in the pharmacy?</li><li>• What are your thoughts on wearing the recorder?</li><li>• Do you feel it altered the way you work?</li><li>• Did you encounter any problems with the research process?</li><li>• What worked well with the research process?</li><li>• What would you recommend to improve the process?</li></ul> |
