# Supplementary material for: A Theory Based Intervention to Enhance Information Exchange during Over-The-Counter Consultations in Community Pharmacy: A Feasibility Study
Source: Pharmacy (Basel). 2019 Jun 20;7(2):73. doi: 10.3390/pharmacy7020073 (PMC6630978; doi:10.3390/pharmacy7020073)
Supplement: Supplementary file 1 [file pharmacy-07-00073-s001.zip]

Archive with 5 entries (5 files):
- Supplementary Material 1 Posters .pdf
- Supplementary Material 2 Badges.pdf
- Supplementary Material 3 Consumer Questionnaire Before and After.pdf
- Supplementary Material 4 Consumer and Pharmacy Personnel interview guides.pdf
- Supplementary Material 5 Consumer Interview data.pdf
